# Supplementary material
Source: MDPI journal article supplement (https://www.mdpi.com/2077-0472/11/8/784)
Supplement: s1 [file s1]

**Table S1.** Germination of different seeds (50 seeds is 100% germination).

|                                              | day 1        | day 2         | day 3         | day 5         | day 7         | day 9         | day 11        | day 13       |
|----------------------------------------------|--------------|---------------|---------------|---------------|---------------|---------------|---------------|--------------|
| <i>Lactuca sativa</i> L.                     |              |               |               |               |               |               |               |              |
| LEAF (10 <sup>-3</sup> )                     | 34.3 ± 3.9 b | 47.8 ± 0.9 b  | 47.8 ± 0.9 b  | 47.8 ± 0.9 b  | 47.8 ± 0.9 b  |               |               |              |
| 10 <sup>-3</sup>                             | NG a         | 2.0 ± 0.6 a   | 4.5 ± 0.5 a   | 8.0 ± 0.7 a   | 10.8 ± 0.8 a  |               |               |              |
| 10 <sup>-4</sup>                             | 49.0 ± 0.6 c | 49.5 ± 0.3 bc | 50.0 ± 0.0 c  | 50.0 ± 0.0 c  | 50.0 ± 0.0 c  |               |               |              |
| 10 <sup>-5</sup>                             | 49.3 ± 0.3 c | 49.5 ± 0.3 bc | 50.0 ± 0.0 c  | 50.0 ± 0.0 c  | 50.0 ± 0.0 c  |               |               |              |
| K1                                           | 50.0 ± 0.0 c | 50.0 ± 0.0 c  | 50.0 ± 0.0 c  | 50.0 ± 0.0 c  | 50.0 ± 0.0 c  |               |               |              |
| K2                                           | 49.0 ± 0.4 c | 49.3 ± 0.3 bc |               |               |              |
| <i>Lens culinaris</i> Medik.                 |              |               |               |               |               |               |               |              |
| LEAF (10 <sup>-3</sup> )                     | NG a         | 19.5 ± 2.9 a  | 44.0 ± 1.4 a  | 46.0 ± 0.8 a  | 46.0 ± 0.8 a  | 46.0 ± 0.8 a  |               |              |
| 10 <sup>-3</sup>                             | 1.0 ± 0.4 ab | 31.3 ± 2.3 ab | 46.8 ± 0.8 a  | 47.5 ± 0.6 a  | 47.5 ± 0.6 a  | 47.5 ± 0.6 a  |               |              |
| 10 <sup>-5</sup>                             | 2.3 ± 0.3 b  | 36.0 ± 1.9 b  | 46.3 ± 1.5 a  | 47.0 ± 0.8 a  | 47.0 ± 0.8 a  | 47.0 ± 0.8 a  |               |              |
| K1                                           | 1.0 ± 0.4 ab | 29.0 ± 6.8 ab | 44.3 ± 2.4 a  | 47.0 ± 0.4 a  | 47.0 ± 0.4 a  | 47.0 ± 0.4 a  |               |              |
| K2                                           | 2.0 ± 0.6 b  | 37.3 ± 2.1 b  | 47.3 ± 0.8 a  |               |              |
| <i>Brassica rapa</i> L. var. <i>japonica</i> |              |               |               |               |               |               |               |              |
| LEAF (10 <sup>-3</sup> )                     | NG a         | 1.5 ± 0.3 a   | 2.8 ± 0.8 a   | 3.5 ± 1.0 a   | 4.5 ± 1.6 a   | 5.0 ± 1.6 a   |               |              |
| 10 <sup>-3</sup>                             | NG a         | 2.3 ± 0.6 a   | 7.5 ± 1.6 a   | 13.5 ± 1.8 b  | 29.3 ± 2.4 b  | 32.0 ± 2.1 b  |               |              |
| 10 <sup>-5</sup>                             | 1.3 ± 0.5 b  | 28.0 ± 1.2 b  | 44.5 ± 1.3 b  | 46.8 ± 0.8 c  | 46.8 ± 0.8 c  | 46.8 ± 0.8 c  |               |              |
| K1                                           | NG a         | 23.3 ± 2.4 b  | 43.5 ± 1.4 b  | 47.5 ± 0.3 c  | 47.5 ± 0.3 c  | 47.5 ± 0.3 c  |               |              |
| K2                                           | 3.3 ± 1.3 b  | 41.0 ± 0.7 c  | 48.3 ± 0.9 b  | 48.5 ± 0.6 c  | 48.5 ± 0.6 c  | 48.5 ± 0.6 c  |               |              |
| <i>Solanum lycopersicum</i> L.               |              |               |               |               |               |               |               |              |
| LEAF (10 <sup>-3</sup> )                     |              |               | NG a          | NG a          | 0.5 ± 0.5 a   | 1.8 ± 0.5 a   | 4.5 ± 1.2 a   |              |
| LEAF (10 <sup>-4</sup> )                     |              |               | 2.0 ± 0.4 ab  | 15.5 ± 0.6 bc | 31.8 ± 1.7 b  | 38.3 ± 1.7 bc | 38.3 ± 1.7 bc |              |
| 10 <sup>-3</sup>                             |              |               | 1.3 ± 0.9 ab  | 12.0 ± 0.9 b  | 34.0 ± 0.9 b  | 36.5 ± 0.9 b  | 36.5 ± 0.9 b  |              |
| 10 <sup>-5</sup>                             |              |               | 7.0 ± 2.0 bc  | 15.0 ± 0.8 bc | 32.0 ± 3.1 b  | 41.0 ± 0.4 c  | 41.0 ± 0.4 c  |              |
| K1                                           |              |               | 5.3 ± 1.9 ab  | 16.0 ± 1.1 c  | 35.8 ± 1.7 b  | 41.3 ± 1.1 c  | 41.3 ± 1.1 c  |              |
| K2                                           |              |               | 11.8 ± 1.9 c  | 31.3 ± 1.1 d  | 44.8 ± 0.8 c  | 46.3 ± 0.5 d  | 46.3 ± 0.5 d  |              |
| <i>Valerianella locusta</i> Laterr.          |              |               |               |               |               |               |               |              |
| LEAF (10 <sup>-3</sup> )                     |              |               |               | NG a          | NG a          | NG a          | NG a          | 0.5 ± 0.3 a  |
| 10 <sup>-3</sup>                             |              |               |               | NG a          | 2.8 ± 1.3 b   | 24.5 ± 1.7 b  | 24.8 ± 1.5 b  | 24.8 ± 1.5 b |
| 10 <sup>-5</sup>                             |              |               |               | NG a          | 3.5 ± 0.9 b   | 19.8 ± 2.8 b  | 21.0 ± 2.5 b  | 21.0 ± 2.5 b |
| K1                                           |              |               |               | 0.5 ± 0.3 a   | 3.8 ± 0.9 b   | 25.5 ± 1.9 b  | 26.8 ± 2.1 b  | 26.8 ± 2.1 b |

|    |             |              |              |              |              |
|----|-------------|--------------|--------------|--------------|--------------|
| K2 | 1.3 ± 0.5 a | 24.0 ± 1.6 c | 35.0 ± 1.8 c | 35.3 ± 2.1 c | 35.3 ± 2.1 c |
|----|-------------|--------------|--------------|--------------|--------------|

Data are means ± standard error. Means followed by different letters across the variety (within columns) are significantly different (p < 0.05). NG; not germinated, K2; control 2 (100% H<sub>2</sub>O), K1; control 1 (0.17% DMSO (Dimethyl sulfoxide) and 0.17% EtOH (Ethanol) dissolved in H<sub>2</sub>O), LEAF (10<sup>-3</sup>); leaf extract dissolved in (0.17% DMSO and 0.17% EtOH in H<sub>2</sub>O) with juglone content measured at 10<sup>-3</sup> M, LEAF (10<sup>-4</sup>); leaf extract dissolved in (0.17% DMSO and 0.17% EtOH in H<sub>2</sub>O) with juglone content measured at 10<sup>-4</sup> M, 10<sup>-3</sup>; standard of juglone dissolved in (0.17% DMSO and 0.17% EtOH in H<sub>2</sub>O) with juglone content at 10<sup>-3</sup> M, 10<sup>-4</sup>; standard of juglone dissolved in (0.17% DMSO and 0.17% EtOH in H<sub>2</sub>O) with juglone content at 10<sup>-4</sup> M, 10<sup>-5</sup>; standard of juglone dissolved in (0.17% DMSO and 0.17% EtOH in H<sub>2</sub>O) with juglone content at 10<sup>-5</sup> M.

**Table S2.** Length of the seedlings in different days of germination

|                                              | day 3           | day 5           | day 7          | day 9          | day 11         |
|----------------------------------------------|-----------------|-----------------|----------------|----------------|----------------|
| <i>Lactuca sativa</i> L.                     |                 |                 |                |                |                |
| LEAF (10 <sup>-3</sup> )                     | 9.01 ± 0.71 b   | 12.70 ± 1.11 b  | 19.25 ± 1.55 b |                |                |
| 10 <sup>-3</sup>                             | 5.66 ± 0.91 a   | 7.03 ± 0.87 a   | 13.32 ± 2.44 a |                |                |
| 10 <sup>-4</sup>                             | 25.26 ± 0.62 c  | 33.38 ± 1.14 c  | 50.37 ± 1.39 c |                |                |
| 10 <sup>-5</sup>                             | 25.59 ± 0.68 c  | 33.66 ± 1.17 c  | 50.12 ± 1.49 c |                |                |
| K1                                           | 24.48 ± 0.73 c  | 33.16 ± 0.73 c  | 51.34 ± 1.46 c |                |                |
| K2                                           | 27.16 ± 0.29 c  | 34.40 ± 0.71 c  | 52.36 ± 1.62 c |                |                |
| <i>Lens culinaris</i> Medik.                 |                 |                 |                |                |                |
| LEAF (10 <sup>-3</sup> )                     | 12.86 ± 0.63 a  | 15.43 ± 0.51 a  | 27.02 ± 0.92 a | 34.88 ± 1.13 a |                |
| 10 <sup>-3</sup>                             | 13.74 ± 0.47 a  | 20.83 ± 0.78 b  | 33.52 ± 1.40 b | 47.53 ± 2.43 b |                |
| 10 <sup>-5</sup>                             | 14.58 ± 0.83 ab | 24.21 ± 0.80 c  | 34.85 ± 1.16 b | 50.94 ± 2.28 b |                |
| K1                                           | 17.16 ± 0.87 bc | 22.85 ± 0.74 bc | 40.57 ± 1.99 c | 59.63 ± 4.52 c |                |
| K2                                           | 19.79 ± 0.66 c  | 24.52 ± 0.59 c  | 44.67 ± 2.84 c | 58.56 ± 3.46 c |                |
| <i>Brassica rapa</i> L. var. <i>japonica</i> |                 |                 |                |                |                |
| LEAF (10 <sup>-3</sup> )                     | 3.86 ± 0.58 a   | 4.92 ± 0.55 a   | 9.66 ± 0.42 a  |                |                |
| 10 <sup>-3</sup>                             | 6.02 ± 1.02 b   | 8.71 ± 1.26 b   | 31.65 ± 1.74 b |                |                |
| 10 <sup>-5</sup>                             | 14.22 ± 1.13 cd | 21.07 ± 0.80 c  | 51.39 ± 3.85 c |                |                |
| K1                                           | 11.87 ± 0.91 c  | 22.03 ± 0.71 c  | 60.47 ± 5.86 c |                |                |
| K2                                           | 17.15 ± 0.84 d  | 21.54 ± 0.95 c  | 54.33 ± 4.54 c |                |                |
| <i>Solanum lycopersicum</i> L.               |                 |                 |                |                |                |
| LEAF (10 <sup>-3</sup> )                     |                 | NG a            | 4.90 ± 0.80 a  | 6.16 ± 1.36 a  | 7.56 ± 0.43 a  |
| LEAF (10 <sup>-4</sup> )                     |                 | 6.97 ± 0.29 c   | 32.12 ± 2.08 c | 66.87 ± 5.17 c | 85.71 ± 2.69 d |
| 10 <sup>-3</sup>                             |                 | 4.26 ± 0.37 b   | 20.86 ± 1.84 b | 30.23 ± 1.14 b | 48.33 ± 1.76 b |
| 10 <sup>-5</sup>                             |                 | 6.98 ± 0.24 c   | 32.81 ± 2.19 c | 59.02 ± 4.25 c | 71.45 ± 3.44 c |

|    |                |                |                |                |
|----|----------------|----------------|----------------|----------------|
| K1 | 7.03 ± 0.41 c  | 32.42 ± 2.09 c | 69.62 ± 6.43 c | 85.80 ± 4.27 d |
| K2 | 11.12 ± 0.33 d | 38.01 ± 1.83 c | 75.81 ± 6.85 c | 94.13 ± 4.63 d |

Data are means ± standard error. Means followed by different letters across the variety (within columns) are significantly different (p <0.05). NG; not germinated, K2; control 2 (100% H<sub>2</sub>O), K1; control 1 (0.17% DMSO (Dimethyl sulfoxide) and 0.17% EtOH (Ethanol) dissolved in H<sub>2</sub>O), LEAF (10<sup>-3</sup>); leaf extract dissolved in (0.17% DMSO and 0.17% EtOH in H<sub>2</sub>O) with juglone content measured at 10<sup>-3</sup> M, LEAF (10<sup>-4</sup>); leaf extract dissolved in (0.17% DMSO and 0.17% EtOH in H<sub>2</sub>O) with juglone content measured at 10<sup>-4</sup> M, 10<sup>-3</sup>; standard of juglone dissolved in (0.17% DMSO and 0.17% EtOH in H<sub>2</sub>O) with juglone content at 10<sup>-3</sup> M, 10<sup>-4</sup>; standard of juglone dissolved in (0.17% DMSO and 0.17% EtOH in H<sub>2</sub>O) with juglone content at 10<sup>-4</sup> M, 10<sup>-5</sup>; standard of juglone dissolved in (0.17% DMSO and 0.17% EtOH in H<sub>2</sub>O) with juglone content at 10<sup>-5</sup> M.

**Table S3.** Root and shoot length of the seedlings of *Solanum lycopersicum* L. and *Lens culinaris* Medik. on the last day of the measurements

|                                | day 9             |                  | day 11            |                  |
|--------------------------------|-------------------|------------------|-------------------|------------------|
|                                | shoot length (mm) | root length (mm) | shoot length (mm) | root length (mm) |
| <i>Lens culinaris</i> Medik.   |                   |                  |                   |                  |
| LEAF (10 <sup>-3</sup> )       | 18.87 ± 1.22 a    | 16.01 ± 0.84 a   |                   |                  |
| 10 <sup>-3</sup>               | 32.76 ± 1.86 b    | 14.78 ± 1.55 a   |                   |                  |
| 10 <sup>-5</sup>               | 25.03 ± 1.76 ab   | 25.91 ± 2.40 b   |                   |                  |
| K1                             | 32.95 ± 3.22 b    | 26.68 ± 2.50 b   |                   |                  |
| K2                             | 29.29 ± 2.16 b    | 29.3 ± 2.33 b    |                   |                  |
| <i>Solanum lycopersicum</i> L. |                   |                  |                   |                  |
| LEAF (10 <sup>-3</sup> )       |                   |                  | 3.26 ± 0.15 a     | 4.30 ± 0.44 a    |
| LEAF (10 <sup>-4</sup> )       |                   |                  | 38.14 ± 3.14 b    | 47.57 ± 1.32 d   |
| 10 <sup>-3</sup>               |                   |                  | 39.40 ± 1.28 bc   | 8.93 ± 1.02 a    |
| 10 <sup>-5</sup>               |                   |                  | 45.45 ± 2.31 bd   | 26.00 ± 1.57 b   |
| K1                             |                   |                  | 47.61 ± 2.68 cd   | 38.18 ± 2.80 c   |
| K2                             |                   |                  | 49.22 ± 1.51 d    | 44.91 ± 3.98 cd  |

Data are means ± standard error. Means followed by different letters across the variety (within columns) are significantly different (p <0.05). NG; not germinated, K2; control 2 (100% H<sub>2</sub>O), K1; control 1 (0.17% DMSO (Dimethyl sulfoxide) and 0.17% EtOH (Ethanol) dissolved in H<sub>2</sub>O), LEAF (10<sup>-3</sup>); leaf extract dissolved in (0.17% DMSO and 0.17% EtOH in H<sub>2</sub>O) with juglone content measured at 10<sup>-3</sup> M, LEAF (10<sup>-4</sup>); leaf extract dissolved in (0.17% DMSO and 0.17% EtOH in H<sub>2</sub>O) with juglone content measured at 10<sup>-4</sup> M, 10<sup>-3</sup>; standard of juglone dissolved in (0.17% DMSO and 0.17% EtOH in H<sub>2</sub>O) with juglone content at 10<sup>-3</sup> M, 10<sup>-4</sup>; standard of juglone dissolved in (0.17% DMSO and 0.17% EtOH in H<sub>2</sub>O) with juglone content at 10<sup>-4</sup> M, 10<sup>-5</sup>; standard of juglone dissolved in (0.17% DMSO and 0.17% EtOH in H<sub>2</sub>O) with juglone content at 10<sup>-5</sup> M

**Table S4.** Individual compounds quantified in *Lens culinaris* Medik. at different days expressed as g/kg dry weight.

| Compounds                                   |       | LEAF (10 <sup>-3</sup> ) | 10 <sup>-3</sup> | 10 <sup>-5</sup> | K1             | K2             |
|---------------------------------------------|-------|--------------------------|------------------|------------------|----------------|----------------|
| phenyl butyryl glutamine                    |       | 2.21 ± 0.04 a            | 2.42 ± 0.05 ab   | 2.91 ± 0.07 c    | 2.65 ± 0.11 bc | 2.75 ± 0.09 c  |
| kaempferol dirhamnoside dihexoside 1        |       | 2.73 ± 0.03 c            | 3.44 ± 0.04 d    | 2.48 ± 0.04 b    | 2.39 ± 0.04 b  | 2.10 ± 0.05 a  |
| kaempferol glycoside. acylated hexoside     |       | 0.03 ± 0.00 a            | 0.07 ± 0.00 b    | 0.09 ± 0.00 c    | 0.09 ± 0.01 c  | 0.10 ± 0.00 c  |
| kaempferol rhamnoside dihexoside            |       | 0.08 ± 0.00 c            | 0.04 ± 0.00 ab   | 0.03 ± 0.00 a    | 0.07 ± 0.01 bc | 0.08 ± 0.00 c  |
| kaempferol glycoside. acylated 1            |       | 0.53 ± 0.02 a            | 0.71 ± 0.02 b    | 0.94 ± 0.04 c    | 0.84 ± 0.01 bc | 0.85 ± 0.06 bc |
| kaempferol glycoside. acylated rhamnoside 1 | day 3 | 0.57 ± 0.01 b            | 0.45 ± 0.01 a    | 0.53 ± 0.01 b    | 0.54 ± 0.01 b  | 0.57 ± 0.02 b  |
| kaempferol trirhamnoside dihexoside 1       |       | 0.58 ± 0.01 d            | 0.39 ± 0.01 a    | 0.39 ± 0.01 ab   | 0.43 ± 0.01 b  | 0.48 ± 0.01 c  |
| kaempferol glycoside. acylated rhamnoside 2 |       | 0.26 ± 0.01 a            | 0.28 ± 0.01 a    | 0.33 ± 0.01 c    | 0.31 ± 0.01 bc | 0.29 ± 0.00 ab |
| kaempferol trirhamnoside dihexoside 2       |       | 1.24 ± 0.05 a            | 1.32 ± 0.02 a    | 1.64 ± 0.05 b    | 1.54 ± 0.04 b  | 1.50 ± 0.04 b  |
| kaempferol glycoside. acylated 2            |       | 0.05 ± 0.00 c            | 0.02 ± 0.00 a    | 0.04 ± 0.00 b    | 0.04 ± 0.00 b  | 0.04 ± 0.00 b  |
| kaempferol dirhamnoside dihexoside 2        |       | 0.11 ± 0.00 a            | 0.11 ± 0.01 a    | 0.17 ± 0.01 b    | 0.16 ± 0.01 b  | 0.12 ± 0.00 a  |
| phenyl butyryl glutamine                    |       | 3.24 ± 0.02 a            | 3.26 ± 0.05 a    | 3.71 ± 0.04 b    | 3.74 ± 0.03 b  | 3.77 ± 0.15 b  |
| kaempferol dirhamnoside dihexoside 1        |       | 1.56 ± 0.02 c            | 1.74 ± 0.04 d    | 1.08 ± 0.01 a    | 1.33 ± 0.01 b  | 1.15 ± 0.03 a  |
| kaempferol glycoside. acylated hexoside     |       | 0.16 ± 0.03 ab           | 0.22 ± 0.02 b    | 0.14 ± 0.00 a    | 0.21 ± 0.01 ab | 0.17 ± 0.01 ab |
| kaempferol rhamnoside dihexoside            |       | 0.15 ± 0.02 a            | 0.21 ± 0.01 b    | 0.17 ± 0.01 ab   | 0.17 ± 0.01 ab | 0.18 ± 0.02 ab |
| kaempferol glycoside. acylated 1            |       | 0.85 ± 0.05 a            | 1.35 ± 0.06 c    | 1.14 ± 0.02 b    | 1.39 ± 0.04 c  | 1.27 ± 0.04 bc |
| kaempferol glycoside. acylated rhamnoside 1 | day 5 | 0.75 ± 0.02 a            | 0.71 ± 0.02 a    | 0.81 ± 0.07 a    | 0.70 ± 0.02 a  | 0.73 ± 0.02 a  |
| kaempferol trirhamnoside dihexoside 1       |       | 0.59 ± 0.00 c            | 0.35 ± 0.00 a    | 0.38 ± 0.00 a    | 0.38 ± 0.01 a  | 0.42 ± 0.01 b  |
| kaempferol glycoside. acylated rhamnoside 2 |       | 0.59 ± 0.01 a            | 0.48 ± 0.01 b    | 0.44 ± 0.01 ab   | 0.46 ± 0.01 b  | 0.47 ± 0.02 b  |
| kaempferol trirhamnoside dihexoside 2       |       | 1.90 ± 0.08 a            | 1.87 ± 0.03 a    | 1.85 ± 0.03 a    | 1.90 ± 0.05 a  | 1.88 ± 0.06 a  |
| kaempferol glycoside. acylated 2            |       | 0.11 ± 0.02 b            | 0.04 ± 0.01 a    | 0.08 ± 0.00 ab   | 0.06 ± 0.00 a  | 0.11 ± 0.01 b  |
| kaempferol dirhamnoside dihexoside 2        |       | 0.19 ± 0.03 a            | 0.14 ± 0.01 a    | 0.15 ± 0.00 a    | 0.15 ± 0.00 a  | 0.16 ± 0.01 a  |
| phenyl butyryl glutamine                    |       | 3.67 ± 0.15 a            | 3.99 ± 0.13 a    | 3.90 ± 0.07 a    | 3.98 ± 0.06 a  | 3.99 ± 0.07 a  |
| kaempferol dirhamnoside dihexoside 1        |       | 1.34 ± 0.04 b            | 0.80 ± 0.02 a    | 0.81 ± 0.02 a    | 0.80 ± 0.02 a  | 0.88 ± 0.02 a  |
| kaempferol glycoside. acylated hexoside     | day 7 | 0.17 ± 0.02 a            | 0.31 ± 0.02 b    | 0.22 ± 0.01 a    | 0.16 ± 0.01 a  | 0.18 ± 0.02 a  |
| kaempferol rhamnoside dihexoside            |       | 0.11 ± 0.01 a            | 0.16 ± 0.01 b    | 0.15 ± 0.01 ab   | 0.16 ± 0.00 b  | 0.16 ± 0.01 b  |
| kaempferol glycoside. acylated 1            |       | 1.00 ± 0.02 a            | 1.56 ± 0.04 c    | 1.31 ± 0.05 b    | 1.34 ± 0.01 b  | 1.37 ± 0.05 b  |

|                                             |        |                |                |                |                |                |
|---------------------------------------------|--------|----------------|----------------|----------------|----------------|----------------|
| kaempferol glycoside. acylated rhamnoside 1 |        | 0.72 ± 0.01 b  | 0.72 ± 0.01 b  | 0.62 ± 0.01 a  | 0.61 ± 0.01 a  | 0.64 ± 0.01 a  |
| kaempferol trirhamnoside dihexoside 1       |        | 0.52 ± 0.01 d  | 0.28 ± 0.01 ab | 0.29 ± 0.01 b  | 0.26 ± 0.01 a  | 0.38 ± 0.01 c  |
| kaempferol glycoside. acylated rhamnoside 2 |        | 0.51 ± 0.01 b  | 0.56 ± 0.01 c  | 0.48 ± 0.01 ab | 0.47 ± 0.01 a  | 0.51 ± 0.01 b  |
| kaempferol trirhamnoside dihexoside 2       |        | 1.89 ± 0.04 b  | 1.73 ± 0.04 ab | 1.60 ± 0.03 a  | 1.65 ± 0.01 a  | 1.85 ± 0.06 b  |
| kaempferol glycoside. acylated 2            |        | 0.18 ± 0.01 b  | 0.09 ± 0.01 a  | 0.09 ± 0.00 a  | 0.08 ± 0.00 a  | 0.11 ± 0.01 a  |
| kaempferol dirhamnoside dihexoside 2        |        | 0.18 ± 0.00 b  | 0.16 ± 0.01 ab | 0.14 ± 0.00 a  | 0.15 ± 0.00 a  | 0.14 ± 0.01 a  |
| phenyl butyryl glutamine                    |        | 3.93 ± 0.04 b  | 3.77 ± 0.04 ab | 3.79 ± 0.07 ab | 3.92 ± 0.03 b  | 3.67 ± 0.09 a  |
| kaempferol dirhamnoside dihexoside 1        |        | 0.51 ± 0.01 c  | 0.38 ± 0.02 a  | 0.39 ± 0.02 ab | 0.50 ± 0.01 c  | 0.45 ± 0.01 bc |
| kaempferol glycoside. acylated hexoside     |        | 0.17 ± 0.02 a  | 0.24 ± 0.01 b  | 0.16 ± 0.01 a  | 0.16 ± 0.01 a  | 0.15 ± 0.01 a  |
| kaempferol rhamnoside dihexoside            |        | 0.08 ± 0.01 a  | 0.12 ± 0.00 b  | 0.08 ± 0.01 ab | 0.11 ± 0.01 ab | 0.10 ± 0.01 ab |
| kaempferol glycoside. acylated 1            |        | 1.08 ± 0.00 a  | 1.31 ± 0.05 b  | 1.17 ± 0.03 ab | 1.19 ± 0.02 ab | 1.31 ± 0.05 b  |
| kaempferol glycoside. acylated rhamnoside 1 | day 10 | 0.52 ± 0.02 b  | 0.41 ± 0.01 a  | 0.40 ± 0.01 a  | 0.48 ± 0.00 b  | 0.40 ± 0.01 a  |
| kaempferol trirhamnoside dihexoside 1       |        | 0.36 ± 0.00 d  | 0.12 ± 0.01 a  | 0.12 ± 0.00 a  | 0.18 ± 0.00 b  | 0.21 ± 0.01 c  |
| kaempferol glycoside. acylated rhamnoside 2 |        | 0.51 ± 0.02 b  | 0.51 ± 0.00 b  | 0.45 ± 0.01 a  | 0.44 ± 0.01 a  | 0.53 ± 0.01 b  |
| kaempferol trirhamnoside dihexoside 2       |        | 1.27 ± 0.07 ab | 1.19 ± 0.02 a  | 1.16 ± 0.02 a  | 1.22 ± 0.04 ab | 1.37 ± 0.03 b  |
| kaempferol glycoside. acylated 2            |        | 0.19 ± 0.01 d  | 0.08 ± 0.00 a  | 0.11 ± 0.01 b  | 0.14 ± 0.00 c  | 0.13 ± 0.01 bc |
| kaempferol dirhamnoside dihexoside 2        |        | 0.13 ± 0.01 ab | 0.12 ± 0.00 a  | 0.13 ± 0.01 ab | 0.15 ± 0.00 b  | 0.14 ± 0.01 ab |
| phenyl butyryl glutamine                    |        | 4.54 ± 0.07 b  | 3.97 ± 0.09 a  | 4.23 ± 0.07 ab | 4.26 ± 0.10 ab | 4.33 ± 0.08 b  |
| kaempferol dirhamnoside dihexoside 1        |        | 0.53 ± 0.01 c  | 0.37 ± 0.02 a  | 0.35 ± 0.01 a  | 0.43 ± 0.02 b  | 0.36 ± 0.02 a  |
| kaempferol glycoside. acylated hexoside     |        | 0.19 ± 0.02 a  | 0.21 ± 0.01 a  | 0.18 ± 0.01 a  | 0.17 ± 0.02 a  | 0.21 ± 0.01 a  |
| kaempferol rhamnoside dihexoside            |        | 0.08 ± 0.01 a  | 0.13 ± 0.01 b  | 0.08 ± 0.01 a  | 0.11 ± 0.01 ab | 0.13 ± 0.02 a  |
| kaempferol glycoside. acylated 1            |        | 0.72 ± 0.04 a  | 0.12 ± 0.03 b  | 1.39 ± 0.02 c  | 1.18 ± 0.07 b  | 1.36 ± 0.02 c  |
| kaempferol glycoside. acylated rhamnoside 1 | day 13 | 0.65 ± 0.01 c  | 0.40 ± 0.01 ab | 0.37 ± 0.01 a  | 0.45 ± 0.02 b  | 0.36 ± 0.01 a  |
| kaempferol trirhamnoside dihexoside 1       |        | 0.31 ± 0.00 c  | 0.11 ± 0.00 a  | 0.11 ± 0.00 a  | 0.11 ± 0.00 a  | 0.15 ± 0.00 b  |
| kaempferol glycoside. acylated rhamnoside 2 |        | 0.48 ± 0.01 b  | 0.47 ± 0.00 b  | 0.43 ± 0.00 a  | 0.45 ± 0.02 ab | 0.46 ± 0.01 ab |
| kaempferol trirhamnoside dihexoside 2       |        | 1.20 ± 0.03 a  | 1.04 ± 0.08 a  | 1.07 ± 0.02 a  | 1.09 ± 0.04 a  | 1.08 ± 0.02 a  |
| kaempferol glycoside. acylated 2            |        | 0.29 ± 0.01 b  | 0.09 ± 0.02 a  | 0.10 ± 0.00 a  | 0.14 ± 0.02 a  | 0.11 ± 0.00 a  |
| kaempferol dirhamnoside dihexoside 2        |        | 0.23 ± 0.02 b  | 0.11 ± 0.01 a  | 0.15 ± 0.01 a  | 0.16 ± 0.02 ab | 0.14 ± 0.00 a  |

Data are means  $\pm$  standard error. Means followed by different letters across different days and the treatment (within rows of days) are significantly different ( $p < 0.05$ ). NG; not germinated, K2; control 2 (100% H<sub>2</sub>O), K1; control 1 (0.17% DMSO (Dimethyl sulfoxide) and 0.17% EtOH (Ethanol) dissolved in H<sub>2</sub>O), LEAF (10<sup>-3</sup>); leaf extract dissolved in (0.17% DMSO and 0.17% EtOH in H<sub>2</sub>O) with juglone content measured at 10<sup>-3</sup> M, LEAF (10<sup>-4</sup>); leaf extract dissolved in (0.17% DMSO and 0.17% EtOH in H<sub>2</sub>O) with juglone content measured at 10<sup>-4</sup> M, 10<sup>-3</sup>; standard of juglone dissolved in (0.17% DMSO and 0.17% EtOH in H<sub>2</sub>O) with juglone content at 10<sup>-3</sup> M, 10<sup>-4</sup>; standard of juglone dissolved in (0.17% DMSO and 0.17% EtOH in H<sub>2</sub>O) with juglone content at 10<sup>-4</sup> M, 10<sup>-5</sup>; standard of juglone dissolved in (0.17% DMSO and 0.17% EtOH in H<sub>2</sub>O) with juglone content at 10<sup>-5</sup> M.

**Table S5.** Individual compounds quantified in *Lactuca sativa* L. at different days expressed as g/kg dry weight.

| Compounds                                | LEAF (10 <sup>-3</sup> ) | 10 <sup>-4</sup>   | 10 <sup>-5</sup>   | K1                 | K2                 |
|------------------------------------------|--------------------------|--------------------|--------------------|--------------------|--------------------|
| 4-hydroxyphenylaoyl glucoside derivative | 1.15 $\pm$ 0.03 a        | 1.32 $\pm$ 0.07 ab | 1.29 $\pm$ 0.04 ab | 1.31 $\pm$ 0.03 ab | 1.40 $\pm$ 0.08 b  |
| neochlorogenic acid                      | 0.25 $\pm$ 0.01 b        | 0.09 $\pm$ 0.01 a  | 0.08 $\pm$ 0.01 a  | 0.09 $\pm$ 0.01 a  | 0.12 $\pm$ 0.02 a  |
| dyhydroxybenzoic acid hexoside           | 0.39 $\pm$ 0.01 a        | 0.73 $\pm$ 0.06 c  | 0.51 $\pm$ 0.01 ab | 0.51 $\pm$ 0.01 ab | 0.69 $\pm$ 0.08 bc |
| chlorogenic acid                         | 1.37 $\pm$ 0.06 a        | 2.30 $\pm$ 0.06 c  | 1.87 $\pm$ 0.05 b  | 2.31 $\pm$ 0.06 c  | 1.98 $\pm$ 0.05 b  |
| caffeic acid                             | 0.42 $\pm$ 0.01 b        | 0.16 $\pm$ 0.02 a  | 0.16 $\pm$ 0.00 a  | 0.18 $\pm$ 0.01 a  | 0.21 $\pm$ 0.02 a  |
| quercetin-3- <i>O</i> -glucoronide       | 1.28 $\pm$ 0.12 b        | 0.11 $\pm$ 0.03 a  | 0.13 $\pm$ 0.01 a  | 0.09 $\pm$ 0.01 a  | 0.21 $\pm$ 0.04 a  |
| 3,5-dicaffeoylquinic acid                | 6.29 $\pm$ 0.13 c        | 4.70 $\pm$ 0.11 b  | 4.72 $\pm$ 0.05 b  | 4.11 $\pm$ 0.09 a  | 5.12 $\pm$ 0.14 b  |
| lactucin-15-oxalate                      | 0.91 $\pm$ 0.02 bc       | 0.87 $\pm$ 0.03 ab | 0.80 $\pm$ 0.01 a  | 0.99 $\pm$ 0.02 c  | 0.97 $\pm$ 0.03 c  |
| caffeoyltartaric acid hexoside           | 5.98 $\pm$ 0.14 bc       | 5.77 $\pm$ 0.18 ab | 5.29 $\pm$ 0.06 a  | 6.53 $\pm$ 0.12 c  | 6.43 $\pm$ 0.21 c  |
| 4-hydroxyphenylaoyl glucoside derivative | 2.16 $\pm$ 0.08 a        | 2.31 $\pm$ 0.05 ab | 2.37 $\pm$ 0.04 ab | 2.46 $\pm$ 0.04 b  | 2.42 $\pm$ 0.11 ab |
| neochlorogenic acid                      | 0.37 $\pm$ 0.04 b        | 0.07 $\pm$ 0.00 a  | 0.06 $\pm$ 0.00 a  | 0.08 $\pm$ 0.00 a  | 0.07 $\pm$ 0.01 a  |
| dyhydroxybenzoic acid hexoside           | 0.54 $\pm$ 0.07 a        | 0.39 $\pm$ 0.04 a  | 0.39 $\pm$ 0.01 a  | 0.46 $\pm$ 0.01 a  | 0.40 $\pm$ 0.04 a  |
| chlorogenic acid                         | 1.45 $\pm$ 0.06 a        | 1.71 $\pm$ 0.03 b  | 1.69 $\pm$ 0.02 b  | 1.78 $\pm$ 0.04 b  | 1.42 $\pm$ 0.09 a  |
| caffeic acid                             | 0.58 $\pm$ 0.03 b        | 0.19 $\pm$ 0.00 a  | 0.20 $\pm$ 0.00 a  | 0.21 $\pm$ 0.01 a  | 0.19 $\pm$ 0.01 a  |
| quercetin-3- <i>O</i> -glucoronide       | 1.10 $\pm$ 0.09 b        | 0.11 $\pm$ 0.03 a  | 0.06 $\pm$ 0.00 a  | 0.24 $\pm$ 0.03 a  | 0.04 $\pm$ 0.00 a  |
| 3,5-dicaffeoylquinic acid                | 5.49 $\pm$ 0.26 b        | 3.30 $\pm$ 0.05 a  | 3.30 $\pm$ 0.04 a  | 3.38 $\pm$ 0.08 a  | 3.27 $\pm$ 0.19 a  |
| lactucin-15-oxalate                      | 0.91 $\pm$ 0.05 a        | 0.94 $\pm$ 0.01 a  | 0.96 $\pm$ 0.03 a  | 1.05 $\pm$ 0.03 a  | 0.99 $\pm$ 0.07 a  |
| caffeoyltartaric acid hexoside           | 5.98 $\pm$ 0.31 a        | 6.23 $\pm$ 0.04 a  | 6.31 $\pm$ 0.17 a  | 6.95 $\pm$ 0.20 a  | 6.51 $\pm$ 0.44 a  |
| 4-hydroxyphenylaoyl glucoside derivative | 3.25 $\pm$ 0.13 d        | 1.49 $\pm$ 0.01 a  | 2.73 $\pm$ 0.07 bc | 3.06 $\pm$ 0.09 cd | 2.39 $\pm$ 0.17 b  |
| neochlorogenic acid                      | 0.07 $\pm$ 0.01 b        | 0.02 $\pm$ 0.00 a  | 0.06 $\pm$ 0.01 ab | 0.06 $\pm$ 0.00 ab | 0.23 $\pm$ 0.01 c  |
| dyhydroxybenzoic acid hexoside           | 0.41 $\pm$ 0.02 b        | 0.32 $\pm$ 0.01 a  | 0.41 $\pm$ 0.01 ab | 0.38 $\pm$ 0.02 ab | 0.56 $\pm$ 0.03 c  |

|                                |               |               |                |                |                |
|--------------------------------|---------------|---------------|----------------|----------------|----------------|
| chlorogenic acid               | 1.71 ± 0.10 d | 0.52 ± 0.02 a | 1.43 ± 0.03 c  | 1.50 ± 0.05 cd | 0.97 ± 0.06 b  |
| caffeic acid                   | 0.42 ± 0.03 d | 0.15 ± 0.01 a | 0.24 ± 0.01 b  | 0.30 ± 0.01 bc | 0.35 ± 0.02 c  |
| quercetin-3-O-glucoronide      | 1.34 ± 0.07 b | 0.10 ± 0.02 a | 0.12 ± 0.02 a  | 0.11 ± 0.03 a  | 0.21 ± 0.04 a  |
| 3,5-dicaffeoylquinic acid      | 3.23 ± 0.14 c | 1.00 ± 0.01 a | 2.53 ± 0.05 b  | 2.63 ± 0.15 b  | 2.94 ± 0.05 bc |
| lactucin-15-oxalate            | 0.91 ± 0.04 d | 0.21 ± 0.01 a | 0.73 ± 0.03 bc | 0.87 ± 0.04 cd | 0.70 ± 0.04 d  |
| caffeoyltartaric acid hexoside | 5.99 ± 0.25 d | 1.38 ± 0.09 a | 4.85 ± 0.18 bc | 5.75 ± 0.23 cd | 4.60 ± 0.25 b  |

Data are means ± standard error. Means followed by different letters across different days and the treatment (within rows of days) are significantly different ( $p < 0.05$ ). NG; not germinated. K2; control 2 (100% H<sub>2</sub>O). K1; control 1 (0.17% DMSO (Dimethyl sulfoxide) and 0.17% EtOH (Ethanol) dissolved in H<sub>2</sub>O). LEAF (10<sup>-3</sup>); leaf extract dissolved in (0.17% DMSO and 0.17% EtOH in H<sub>2</sub>O) with juglone content measured at 10<sup>-3</sup> M. LEAF (10<sup>-4</sup>); leaf extract dissolved in (0.17% DMSO and 0.17% EtOH in H<sub>2</sub>O) with juglone content measured at 10<sup>-4</sup> M. 10<sup>-3</sup>; standard of juglone dissolved in (0.17% DMSO and 0.17% EtOH in H<sub>2</sub>O) with juglone content at 10<sup>-3</sup> M. 10<sup>-4</sup>; standard of juglone dissolved in (0.17% DMSO and 0.17% EtOH in H<sub>2</sub>O) with juglone content at 10<sup>-4</sup> M. 10<sup>-5</sup>; standard of juglone dissolved in (0.17% DMSO and 0.17% EtOH in H<sub>2</sub>O) with juglone content at 10<sup>-5</sup> M.

**Table S6.** Individual compounds quantified in *Solanum lycopersicum* L. at different days expressed as g/kg dry weight.

| Compounds                        | LEAF (10 <sup>-4</sup> ) | 10 <sup>-3</sup> | 10 <sup>-5</sup> | K1             | K2             |
|----------------------------------|--------------------------|------------------|------------------|----------------|----------------|
| caffeoyl hexaric acid 1          | 0.39 ± 0.01 a            | 0.43 ± 0.01 a    | 0.44 ± 0.02 a    | 0.40 ± 0.01 a  | 0.60 ± 0.01 b  |
| phenyl butyryl glutamine         | 1.39 ± 0.07 b            | 1.06 ± 0.06 a    | 1.37 ± 0.09 b    | 1.00 ± 0.02 a  | 1.42 ± 0.05 b  |
| caffeoyl hexaric acid 2          | 0.72 ± 0.01 b            | 0.72 ± 0.04 b    | 0.68 ± 0.02 ab   | 0.59 ± 0.01 a  | 0.59 ± 0.00 a  |
| decatylosperuloside derivative 1 | 0.45 ± 0.01 a            | 0.48 ± 0.03 a    | 0.58 ± 0.02 b    | 0.47 ± 0.03 ab | 0.49 ± 0.01 a  |
| caffeic acid hexoside            | 0.10 ± 0.00 b            | 0.07 ± 0.01 a    | 0.12 ± 0.01 b    | 0.10 ± 0.01 ab | 0.11 ± 0.01 b  |
| decatylosperuloside derivative 2 | 0.32 ± 0.01 bc           | 0.23 ± 0.01 a    | 0.42 ± 0.02 d    | 0.28 ± 0.03 ab | 0.39 ± 0.02 cd |
| chlorogenic acid                 | 3.56 ± 0.06 a            | 3.70 ± 0.04 a    | 4.64 ± 0.14 b    | 3.62 ± 0.06 a  | 3.80 ± 0.05 a  |
| cryptochlorogenic acid           | 0.07 ± 0.01 a            | 0.04 ± 0.01 a    | 0.12 ± 0.02 b    | 0.08 ± 0.01 ab | 0.07 ± 0.00 a  |
| coumaroylquinnic acid 1          | 0.01 ± 0.00 a            | 0.12 ± 0.00 b    | 0.01 ± 0.00 a    | 0.01 ± 0.00 a  | 0.01 ± 0.00 a  |
| quercetin diglucoside            | 0.07 ± 0.00 ab           | 0.10 ± 0.01 c    | 0.08 ± 0.01 bc   | 0.06 ± 0.00 a  | 0.08 ± 0.00 ac |
| coumaroylquinnic acid 2          | 0.01 ± 0.00 ab           | 0.01 ± 0.00 a    | 0.04 ± 0.00 c    | 0.02 ± 0.00 b  | 0.03 ± 0.00 c  |
| indole-3-acetylasparginic acid   | 0.80 ± 0.01 bc           | 0.68 ± 0.01 a    | 0.74 ± 0.02 ab   | 0.68 ± 0.01 a  | 0.81 ± 0.01 c  |
| caffeoyl hexaric acid 1          | 1.04 ± 0.08 bc           | 0.59 ± 0.02 a    | 1.12 ± 0.05 c    | 0.87 ± 0.01 b  | 1.47 ± 0.07 d  |
| phenyl butyryl glutamine         | 1.12 ± 0.08 b            | 1.50 ± 0.05 c    | 1.37 ± 0.05 bc   | 0.55 ± 0.02 a  | 1.52 ± 0.07 c  |
| caffeoyl hexaric acid 2          | 0.57 ± 0.03 a            | 0.57 ± 0.01 a    | 0.50 ± 0.02 a    | 0.52 ± 0.03 a  | 0.55 ± 0.04 a  |

|                                  |        |                |                |                |                |                |
|----------------------------------|--------|----------------|----------------|----------------|----------------|----------------|
| decatylosperuloside derivative 1 |        | 0.39 ± 0.03 b  | 0.52 ± 0.04 bc | 0.66 ± 0.04 c  | 0.16 ± 0.03 a  | 0.83 ± 0.03 d  |
| caffeic acid hexoside            |        | 0.09 ± 0.00 b  | 0.08 ± 0.01 b  | 0.12 ± 0.00 c  | 0.05 ± 0.01 a  | 0.13 ± 0.01 c  |
| decatylosperuloside derivative 2 |        | 0.33 ± 0.05 b  | 0.47 ± 0.06 bc | 0.45 ± 0.04 bc | 0.15 ± 0.03 a  | 0.56 ± 0.02 c  |
| chlorogenic acid                 |        | 2.59 ± 0.06 b  | 4.07 ± 0.07 c  | 3.92 ± 0.04 c  | 1.41 ± 0.02 a  | 4.46 ± 0.07 d  |
| cryptochlorogenic acid           |        | 0.07 ± 0.02 ab | 0.08 ± 0.01 ab | 0.14 ± 0.00 bc | 0.05 ± 0.00 a  | 0.20 ± 0.03 c  |
| coumaroylquinnic acid 1          |        | 0.01 ± 0.00 a  | 0.09 ± 0.00 b  | 0.01 ± 0.00 a  | 0.01 ± 0.00 a  | 0.01 ± 0.00 a  |
| quercetin diglucoside            |        | 0.04 ± 0.00 a  | 0.09 ± 0.01 b  | 0.06 ± 0.00 ab | 0.03 ± 0.00 b  | 0.09 ± 0.02 a  |
| coumaroylquinnic acid 2          |        | 0.01 ± 0.00 a  | 0.07 ± 0.01 c  | 0.03 ± 0.00 b  | 0.01 ± 0.00 a  | 0.04 ± 0.01 b  |
| indole-3-acetylasparaginic acid  |        | 0.87 ± 0.01 b  | 0.80 ± 0.03 ab | 0.85 ± 0.03 ab | 0.74 ± 0.03 a  | 0.92 ± 0.04 b  |
| caffeoyl hexaric acid 1          |        | 1.34 ± 0.07 b  | 0.79 ± 0.05 a  | 1.24 ± 0.02 b  | 1.33 ± 0.10 b  | 1.75 ± 0.11 c  |
| phenyl butyryl glutamine         |        | 1.45 ± 0.06 c  | 0.98 ± 0.08 a  | 1.04 ± 0.04 ab | 1.02 ± 0.15 ab | 1.38 ± 0.08 bc |
| caffeoyl hexaric acid 2          |        | 0.51 ± 0.03 a  | 0.47 ± 0.03 a  | 0.43 ± 0.01 a  | 0.46 ± 0.02 a  | 0.43 ± 0.03 a  |
| decatylosperuloside derivative 1 |        | 0.56 ± 0.03 ab | 0.37 ± 0.07 a  | 0.46 ± 0.01 ab | 0.69 ± 0.08 bc | 0.86 ± 0.05 c  |
| caffeic acid hexoside            |        | 0.09 ± 0.00 a  | 0.10 ± 0.02 a  | 0.11 ± 0.00 a  | 0.12 ± 0.01 a  | 0.11 ± 0.02 a  |
| decatylosperuloside derivative 2 | Day 13 | 0.38 ± 0.02 c  | 0.23 ± 0.02 a  | 0.29 ± 0.02 ab | 0.32 ± 0.02 bc | 0.32 ± 0.03 bc |
| chlorogenic acid                 |        | 3.05 ± 0.10 ab | 2.55 ± 0.07 a  | 3.61 ± 0.06 b  | 4.29 ± 0.10 c  | 4.32 ± 0.29 c  |
| cryptochlorogenic acid           |        | 0.14 ± 0.02 a  | 0.10 ± 0.01 a  | 0.12 ± 0.01 a  | 0.20 ± 0.04 a  | 0.13 ± 0.02 a  |
| coumaroylquinnic acid 1          |        | 0.01 ± 0.00 a  | 0.09 ± 0.00 b  | 0.04 ± 0.00 a  | 0.01 ± 0.00 a  | 0.00 ± 0.00 a  |
| quercetin diglucoside            |        | 0.08 ± 0.02 a  | 0.05 ± 0.01 a  | 0.05 ± 0.01 a  | 0.11 ± 0.04 a  | 0.07 ± 0.00 a  |
| coumaroylquinnic acid 2          |        | 0.04 ± 0.00 ab | 0.02 ± 0.00 a  | 0.05 ± 0.00 ab | 0.06 ± 0.01 b  | 0.04 ± 0.00 ab |
| indole-3-acetylasparaginic acid  |        | 0.92 ± 0.03 a  | 0.82 ± 0.02 a  | 0.89 ± 0.02 a  | 0.95 ± 0.06 a  | 0.98 ± 0.06 a  |
| caffeoyl hexaric acid 1          |        | 1.57 ± 0.07 b  | 1.13 ± 0.05 a  | 1.40 ± 0.03 b  | 1.20 ± 0.03 a  | 1.59 ± 0.04 b  |
| phenyl butyryl glutamine         |        | 1.04 ± 0.07 b  | 0.94 ± 0.04 b  | 0.81 ± 0.08 b  | 0.39 ± 0.03 a  | 0.20 ± 0.02 a  |
| caffeoyl hexaric acid 2          |        | 0.51 ± 0.03 d  | 0.41 ± 0.02 c  | 0.32 ± 0.02 b  | 0.30 ± 0.01 b  | 0.21 ± 0.01 a  |
| decatylosperuloside derivative 1 | Day 15 | 0.53 ± 0.02 c  | 0.50 ± 0.03 c  | 0.53 ± 0.01 c  | 0.39 ± 0.03 b  | 0.15 ± 0.02 a  |
| caffeic acid hexoside            |        | 0.08 ± 0.00 c  | 0.07 ± 0.01 bc | 0.12 ± 0.01 d  | 0.05 ± 0.01 b  | 0.02 ± 0.00 a  |
| decatylosperuloside derivative 2 |        | 0.38 ± 0.01 d  | 0.22 ± 0.02 bc | 0.31 ± 0.03 cd | 0.20 ± 0.03 b  | 0.04 ± 0.01 a  |
| chlorogenic acid                 |        | 2.97 ± 0.01 d  | 2.77 ± 0.04 c  | 3.58 ± 0.06 e  | 2.55 ± 0.03 b  | 0.87 ± 0.03 a  |
| cryptochlorogenic acid           |        | 0.10 ± 0.01 b  | 0.08 ± 0.01 ab | 0.14 ± 0.01 c  | 0.08 ± 0.00 ab | 0.05 ± 0.00 a  |



|                         |                |               |                |                |               |
|-------------------------|----------------|---------------|----------------|----------------|---------------|
| coummaroylquinic acid 1 | 0.00 ± 0.00 a  | 0.08 ± 0.00 b | 0.00 ± 0.00 a  | 0.00 ± 0.00 a  | 0.00 ± 0.00 a |
| quercetin diglucoside   | 0.05 ± 0.00 b  | 0.07 ± 0.00 c | 0.05 ± 0.00 b  | 0.04 ± 0.00 ab | 0.03 ± 0.00 a |
| coummaroylquinic acid 2 | 0.03 ± 0.00 b  | 0.04 ± 0.01 c | 0.02 ± 0.00 b  | 0.01 ± 0.00 ab | 0.00 ± 0.00 a |
| indole-3-acetylserine   | 0.90 ± 0.04 ab | 0.96 ± 0.03 b | 0.83 ± 0.04 ab | 0.86 ± 0.02 ab | 0.80 ± 0.04 a |

Data are means ± standard error. Means followed by different letters across different days and the treatment (within rows of days) are significantly different ( $p < 0.05$ ). NG; not germinated. K2; control 2 (100% H<sub>2</sub>O). K1; control 1 (0.17% DMSO (Dimethyl sulfoxide) and 0.17% EtOH (Ethanol) dissolved in H<sub>2</sub>O). LEAF (10<sup>-3</sup>); leaf extract dissolved in (0.17% DMSO and 0.17% EtOH in H<sub>2</sub>O) with juglone content measured at 10<sup>-3</sup> M. LEAF (10<sup>-4</sup>); leaf extract dissolved in (0.17% DMSO and 0.17% EtOH in H<sub>2</sub>O) with juglone content measured at 10<sup>-4</sup> M. 10<sup>-3</sup>; standard of juglone dissolved in (0.17% DMSO and 0.17% EtOH in H<sub>2</sub>O) with juglone content at 10<sup>-3</sup> M. 10<sup>-4</sup>; standard of juglone dissolved in (0.17% DMSO and 0.17% EtOH in H<sub>2</sub>O) with juglone content at 10<sup>-4</sup> M. 10<sup>-5</sup>; standard of juglone dissolved in (0.17% DMSO and 0.17% EtOH in H<sub>2</sub>O) with juglone content at 10<sup>-5</sup> M.
